# Supplementary material
Source: PubMed Central journal article supplement (PMC4879357)
Supplement: AAC.00038-16_zac006165199so1.pdf [file AAC.00038-16_zac006165199so1.pdf]

**Supplemental Material Table S1.** HIV-1 genotype based on Sanger sequencing.

| Group <sup>a</sup>                                                                                      | Patient ID | HIV-1 drug resistance mutations in the RT identified by Sanger sequencing |
|---------------------------------------------------------------------------------------------------------|------------|---------------------------------------------------------------------------|
| (I) Treatment failure in the presence of drug resistance mutations detected by Sanger Sequencing (n=27) | 0113-13    | K103N, M184I                                                              |
|                                                                                                         | 135-13     | K103N                                                                     |
|                                                                                                         | 137-13     | K103N, Y181C, G190A                                                       |
|                                                                                                         | dr-83-13   | K103N                                                                     |
|                                                                                                         | dr-92-13   | K103N, M184V/I                                                            |
|                                                                                                         | 96-13      | Y181C                                                                     |
|                                                                                                         | 223-13     | M184I                                                                     |
|                                                                                                         | 176-13     | L74I, K103N, M184V, P225H                                                 |
|                                                                                                         | 200-13     | D67N, V106A, M184V, G190A, E138A, F227L                                   |
|                                                                                                         | EN-7-13    | K103N                                                                     |
|                                                                                                         | 42-13      | K103N, M184V, G190A, A98G                                                 |
|                                                                                                         | 143-12     | K103N, M184V, P225H                                                       |
|                                                                                                         | 186-12     | K103N, M184V, V179T                                                       |
|                                                                                                         | 65-12      | K103N, V179I, K219Q                                                       |
|                                                                                                         | 70-12      | D67N, K70R, M184V, G190A                                                  |
|                                                                                                         | 106-12     | M41L, M184V, T215F, K219W, V179I                                          |
|                                                                                                         | 109-12     | K103N                                                                     |
|                                                                                                         | 123-12     | K103N, Y188L                                                              |
|                                                                                                         | 124-12     | M184I                                                                     |
|                                                                                                         | 134-12     | K103N                                                                     |
|                                                                                                         | 193-12     | K103N, E138A                                                              |
|                                                                                                         | 207-12     | K103N, M184V                                                              |
|                                                                                                         | DR-31-11   | M41L, K70R, K103N/S, Y181C, M184V, G190A, T215F, V108I                    |
|                                                                                                         | DR-18-11   | K70E, V75I, K101H, V108I, Y181C, M184V, G190A, F227L                      |
|                                                                                                         | DR-286-08  | K103N                                                                     |
|                                                                                                         | DR-371-08  | Y181I, M184V                                                              |
|                                                                                                         | DR-30-11   | M41L, K70R, M184V                                                         |
| (II) Treatment failure in the absence of drug resistance mutations detected by Sanger Sequencing (n=21) | 109-13     | None                                                                      |
|                                                                                                         | 89-13      | None                                                                      |
|                                                                                                         | 106-13     | None                                                                      |
|                                                                                                         | 156-13     | None                                                                      |
|                                                                                                         | 214-13     | None                                                                      |
|                                                                                                         | 218-13     | None                                                                      |
|                                                                                                         | 81-13      | None                                                                      |
|                                                                                                         | 177-13     | None                                                                      |
|                                                                                                         | EN-10-13   | None                                                                      |
|                                                                                                         | 72-12      | None                                                                      |
| dr-82-12                                                                                                | None       |                                                                           |

|                                                                                                                  |            |      |
|------------------------------------------------------------------------------------------------------------------|------------|------|
|                                                                                                                  | 110-12     | None |
|                                                                                                                  | 111-12     | None |
|                                                                                                                  | 135-12     | None |
|                                                                                                                  | 170-12     | None |
|                                                                                                                  | 172-12     | None |
|                                                                                                                  | dr-0036-08 | None |
|                                                                                                                  | DR-0115-11 | None |
|                                                                                                                  | DR-193-11  | None |
|                                                                                                                  | DR-269-08  | None |
|                                                                                                                  | DR-50-11   | None |
| (III) Treatment failure in the absence of drug resistance mutations detected by Sanger or deep sequencing (n=12) | 216-13     | None |
|                                                                                                                  | 38-13      | None |
|                                                                                                                  | 66-13      | None |
|                                                                                                                  | 130-12     | None |
|                                                                                                                  | 30-12      | None |
|                                                                                                                  | 22-12      | None |
|                                                                                                                  | 14-12      | None |
|                                                                                                                  | 64-12      | None |
|                                                                                                                  | 205-12     | None |
|                                                                                                                  | dr-0043-11 | None |
|                                                                                                                  | DR-212-11  | None |
|                                                                                                                  | DR-001-09  | None |
| (IV) Treatment success (n=5)                                                                                     | 62-12      | None |
|                                                                                                                  | 27-12      | None |
|                                                                                                                  | 23-12      | None |
|                                                                                                                  | 197-12     | None |
|                                                                                                                  | 215-12     | None |

<sup>a</sup> Group of patients clustered by their response to treatment with antiretroviral drugs in the presence or absence of drug resistance mutations detected using HIV-1 genotyping assays based on Sanger or deep sequencing (DEEPGEN). Patient-derived PCR products corresponding to the RT-coding region were originally sequenced as described in Materials and Methods (1). HIV-1 sequences were interpreted, and drug resistance profiles generated, with the help of the Stanford University HIV Drug Resistance Database (<http://hivdb.stanford.edu>).

1. **Kyeyune F, Nankya I, Metha S, Akao J, Ndashimye E, Tebit DM, Rodriguez B, Kityo C, Salata RA, Mugenyi P, Arts E.** 2013. Treatment failure and drug resistance is more frequent in HIV-1 subtype D versus subtype A-infected Ugandans over a 10-year study period. *AIDS* **27**:1899-1909.

| Group | Sample ID | Protein | Mutation | Prevalence |
|-------|-----------|---------|----------|------------|
| I     | 1         | RT      | K103N    | 97.3       |
| I     | 1         | RT      | V118I    | 66.16      |
| I     | 1         | RT      | M184I    | 65.77      |
| I     | 1         | RT      | M230I    | 65.19      |
| I     | 1         | PROT    | I84V     | 1.16       |
| I     | 2         | RT      | D67N     | 12.82      |
| I     | 2         | RT      | K70R     | 13.86      |
| I     | 2         | RT      | K103N    | 31.35      |
| I     | 2         | RT      | E138A    | 98.18      |
| I     | 2         | RT      | M184V    | 19.69      |
| I     | 2         | RT      | T215I    | 4.43       |
| I     | 2         | RT      | K219Q    | 16.25      |
| I     | 2         | RT      | P225H    | 5.18       |
| I     | 2         | RT      | M230I    | 2.16       |
| I     | 2         | RT      | K238T    | 12.35      |
| I     | 2         | PROT    | L10F     | 2.43       |
| I     | 2         | INT     | R263K    | 1.6        |
| I     | 3         | RT      | K103N    | 99.01      |
| I     | 3         | RT      | Y181C    | 81.3       |
| I     | 3         | RT      | M184V    | 3.29       |
| I     | 3         | RT      | G190A    | 80.54      |
| I     | 3         | RT      | T215I    | 1.1        |
| I     | 3         | RT      | K219Q    | 3.95       |
| I     | 3         | RT      | K238T    | 2.59       |
| I     | 3         | PROT    | F53L     | 1.08       |
| I     | 4         | RT      | K103N    | 98.62      |
| I     | 4         | PROT    | N83D     | 1.01       |
| I     | 5         | RT      | K103N    | 88.75      |
| I     | 5         | RT      | M184I    | 30.6       |
| I     | 5         | RT      | M184V    | 59.1       |
| I     | 5         | RT      | K219E    | 57.28      |
| I     | 5         | RT      | P225H    | 65.99      |
| I     | 5         | RT      | K238T    | 99.47      |
| I     | 6         | RT      | Y181C    | 99.61      |
| I     | 6         | PROT    | F53L     | 1.22       |
| I     | 6         | PROT    | I54T     | 1.07       |
| I     | 7         | RT      | M184I    | 84.92      |
| I     | 7         | RT      | M230I    | 87.19      |
| I     | 7         | PROT    | G73S     | 79.93      |
| I     | 7         | PROT    | N88S     | 3.31       |
| I     | 7         | INT     | G140S    | 1.88       |

|  |    |      |       |       |
|--|----|------|-------|-------|
|  | 7  | INT  | G163R | 95.39 |
|  | 8  | RT   | L74I  | 58.75 |
|  | 8  | RT   | L100I | 2.4   |
|  | 8  | RT   | K103N | 54.4  |
|  | 8  | RT   | K103S | 10.47 |
|  | 8  | RT   | M184V | 48.43 |
|  | 8  | RT   | G190A | 9.39  |
|  | 8  | RT   | P225H | 58.42 |
|  | 8  | RT   | F227L | 1.04  |
|  | 8  | PROT | K20I  | 98.43 |
|  | 8  | INT  | T97A  | 60.65 |
|  | 9  | RT   | D67N  | 98.38 |
|  | 9  | RT   | K70G  | 99.1  |
|  | 9  | RT   | K101E | 22.98 |
|  | 9  | RT   | V106A | 98.39 |
|  | 9  | RT   | E138A | 98.77 |
|  | 9  | RT   | V179E | 70.69 |
|  | 9  | RT   | M184V | 98.08 |
|  | 9  | RT   | G190A | 99.07 |
|  | 9  | RT   | K219Q | 98.58 |
|  | 9  | RT   | F227L | 98.24 |
|  | 9  | PROT | Q58E  | 99.05 |
|  | 10 | RT   | D67N  | 1.42  |
|  | 10 | RT   | K70G  | 1.16  |
|  | 10 | RT   | K103N | 96.35 |
|  | 10 | RT   | V106A | 1.55  |
|  | 10 | RT   | E138A | 1.66  |
|  | 10 | RT   | V179E | 1.85  |
|  | 10 | RT   | M184V | 2.71  |
|  | 10 | RT   | G190A | 2.74  |
|  | 10 | RT   | K219Q | 3.07  |
|  | 10 | RT   | F227L | 4.3   |
|  | 10 | PROT | F53L  | 1.1   |
|  | 10 | PROT | Q58E  | 1     |
|  | 11 | RT   | K70R  | 98.98 |
|  | 11 | RT   | A98G  | 97.23 |
|  | 11 | RT   | K103N | 66.73 |
|  | 11 | RT   | M184V | 93.62 |
|  | 11 | RT   | G190A | 33.65 |
|  | 11 | RT   | K219* | 8.5   |
|  | 12 | RT   | K103N | 98.55 |
|  | 12 | RT   | M184V | 99.03 |

|  |    |      |       |       |
|--|----|------|-------|-------|
|  | 12 | RT   | P225H | 98.15 |
|  | 12 | RT   | K238N | 99.34 |
|  | 12 | PROT | F53L  | 1.01  |
|  | 13 | RT   | K103N | 36.36 |
|  | 13 | RT   | E138A | 6.67  |
|  | 13 | RT   | V179T | 44.44 |
|  | 13 | RT   | V179E | 3.7   |
|  | 13 | RT   | M184V | 43.33 |
|  | 13 | RT   | G190A | 3.33  |
|  | 13 | RT   | P225H | 21.62 |
|  | 13 | RT   | F227L | 2.7   |
|  | 13 | RT   | K238N | 17.95 |
|  | 13 | INT  | T97A  | 8.33  |
|  | 14 | RT   | K103N | 28.69 |
|  | 14 | RT   | M184I | 4.34  |
|  | 14 | RT   | G190A | 1.66  |
|  | 14 | RT   | M230I | 1.33  |
|  | 14 | PROT | G73S  | 1.61  |
|  | 14 | INT  | G163R | 1.24  |
|  | 15 | RT   | D67N  | 73.88 |
|  | 15 | RT   | K70R  | 78.46 |
|  | 15 | RT   | M184V | 76.51 |
|  | 15 | RT   | G190A | 77.98 |
|  | 15 | RT   | K219Q | 79.31 |
|  | 15 | PROT | K20I  | 96.37 |
|  | 16 | RT   | M41L  | 97.19 |
|  | 16 | RT   | M184V | 99.43 |
|  | 16 | RT   | T215F | 99.77 |
|  | 16 | RT   | K219W | 99.09 |
|  | 16 | INT  | T97A  | 1.24  |
|  | 16 | INT  | Y143H | 1.6   |
|  | 17 | RT   | K103N | 62.49 |
|  | 17 | INT  | T97A  | 30.03 |
|  | 18 | RT   | K103N | 98.54 |
|  | 18 | RT   | Y188L | 98.9  |
|  | 18 | PROT | K20T  | 92.12 |
|  | 19 | RT   | D67N  | 1.12  |
|  | 19 | RT   | M184I | 41.32 |
|  | 19 | RT   | M230I | 40.19 |
|  | 20 | RT   | K103N | 98.2  |
|  | 20 | PROT | K20I  | 85.46 |
|  | 21 | RT   | K103N | 97.49 |

|  |    |      |       |       |
|--|----|------|-------|-------|
|  | 21 | RT   | E138A | 99.93 |
|  | 21 | PROT | F53L  | 1.36  |
|  | 22 | RT   | M41L  | 14.91 |
|  | 22 | RT   | D67G  | 13.45 |
|  | 22 | RT   | T69N  | 99.66 |
|  | 22 | RT   | K70E  | 82.31 |
|  | 22 | RT   | K70R  | 15.45 |
|  | 22 | RT   | V75L  | 15.24 |
|  | 22 | RT   | K103N | 98.72 |
|  | 22 | RT   | V108I | 15.87 |
|  | 22 | RT   | M184V | 98.95 |
|  | 22 | RT   | G190A | 5.83  |
|  | 22 | RT   | T215I | 4.03  |
|  | 22 | RT   | K219E | 4.86  |
|  | 22 | RT   | K219R | 93.98 |
|  | 22 | RT   | P225H | 93.87 |
|  | 22 | INT  | N155S | 1.37  |
|  | 23 | RT   | M41L  | 31.87 |
|  | 23 | RT   | T69N  | 99.2  |
|  | 23 | RT   | K70R  | 89.1  |
|  | 23 | RT   | A98G  | 47.73 |
|  | 23 | RT   | K101E | 2.19  |
|  | 23 | RT   | K103N | 66.94 |
|  | 23 | RT   | K103S | 28.44 |
|  | 23 | RT   | V108I | 92.42 |
|  | 23 | RT   | Y181C | 66.88 |
|  | 23 | RT   | M184V | 99.04 |
|  | 23 | RT   | G190A | 27.59 |
|  | 23 | RT   | T215I | 2.06  |
|  | 23 | RT   | T215F | 38.4  |
|  | 23 | RT   | K219Q | 94.84 |
|  | 23 | RT   | H221Y | 12.53 |
|  | 23 | PROT | K20T  | 95.08 |
|  | 23 | PROT | L90M  | 99.36 |
|  | 23 | INT  | T97A  | 98.95 |
|  | 24 | RT   | D67N  | 1.63  |
|  | 24 | RT   | K70E  | 36.98 |
|  | 24 | RT   | V75I  | 37.32 |
|  | 24 | RT   | K101H | 51.36 |
|  | 24 | RT   | V108I | 36.82 |
|  | 24 | RT   | Y181C | 41.21 |
|  | 24 | RT   | M184V | 54.25 |

|  |    |      |       |       |
|--|----|------|-------|-------|
|  | 24 | RT   | G190A | 54.22 |
|  | 24 | RT   | F227L | 40.34 |
|  | 25 | RT   | D67N  | 1.26  |
|  | 25 | RT   | K103N | 24.91 |
|  | 26 | RT   | D67N  | 1.39  |
|  | 26 | RT   | Y181I | 96.73 |
|  | 26 | RT   | M184V | 99.03 |
|  | 27 | RT   | M41L  | 43.36 |
|  | 27 | RT   | K70R  | 68.99 |
|  | 27 | RT   | M184V | 69.21 |
|  | 27 | RT   | N348I | 1.99  |
|  | 27 | PROT | F53L  | 4.08  |

| Group | Sample ID | Protein | Mutation | Prevalence |
|-------|-----------|---------|----------|------------|
| II    | 028-1     | RT      | K65R     | 2.53       |
| II    | 028-1     | RT      | T69N     | 1.8        |
| II    | 028-1     | RT      | L74I     | 1.6        |
| II    | 028-1     | RT      | K103N    | 11.14      |
| II    | 028-1     | RT      | V118I    | 6.87       |
| II    | 028-1     | RT      | M184I    | 6.85       |
| II    | 028-1     | RT      | M184V    | 6.24       |
| II    | 028-1     | RT      | P225H    | 1.26       |
| II    | 028-1     | RT      | M230I    | 8.73       |
| II    | 028-1     | PROT    | L10F     | 67.84      |
| II    | 028-1     | PROT    | K20I     | 2.34       |
| II    | 028-1     | PROT    | K20T     | 65.68      |
| II    | 028-1     | PROT    | F53L     | 24         |
| II    | 028-1     | PROT    | I54V     | 57.08      |
| II    | 028-1     | PROT    | V82A     | 58.76      |
| II    | 034-1     | RT      | L100I    | 2.16       |
| II    | 037-1     | RT      | M184V    | 3.58       |
| II    | 037-1     | PROT    | F53L     | 1.27       |
| II    | 037-1     | INT     | L74I     | 93.73      |
| II    | 038-1     | RT      | M184V    | 2.08       |
| II    | 038-1     | RT      | M184I    | 5.57       |
| II    | 038-1     | RT      | M230I    | 8.2        |
| II    | 038-1     | PROT    | G73S     | 1.46       |
| II    | 038-1     | INT     | T97A     | 68.32      |
| II    | 038-1     | INT     | G163R    | 1.36       |
| II    | 039-1     | RT      | K103R    | 1.39       |
| II    | 039-1     | RT      | E138G    | 3.11       |
| II    | 039-1     | RT      | V179L    | 2.15       |
| II    | 039-1     | RT      | V179T    | 89.5       |
| II    | 039-1     | PROT    | F53L     | 1.05       |
| II    | 045-1     | RT      | D67G     | 2.99       |
| II    | 045-1     | RT      | M184I    | 16         |
| II    | 045-1     | RT      | M230I    | 21.44      |
| II    | 045-1     | PROT    | F53L     | 1.1        |
| II    | 045-1     | PROT    | G73S     | 13.34      |
| II    | 045-1     | INT     | G163R    | 49         |
| II    | 044-1     | RT      | D67N     | 1.04       |
| II    | 044-1     | RT      | M184I    | 1.55       |
| II    | 044-1     | RT      | M230I    | 1.55       |
| II    | 044-1     | INT     | G163R    | 2.5        |
| II    | 048-1     | RT      | D67N     | 1.04       |



|    |       |      |       |       |
|----|-------|------|-------|-------|
| II | 048-1 | RT   | E138G | 1.42  |
| II | 048-1 | RT   | E138K | 10.96 |
| II | 048-1 | RT   | M184I | 16.8  |
| II | 048-1 | RT   | M230I | 18.8  |
| II | 048-1 | PROT | F53L  | 1.36  |
| II | 048-1 | PROT | G73S  | 14.83 |
| II | 048-1 | INT  | G163K | 15.43 |
| II | 051-1 | RT   | K103N | 1.04  |
| II | 051-1 | PROT | K20I  | 96.79 |
| II | 069-1 | RT   | D67N  | 1.48  |
| II | 069-1 | RT   | V118I | 99.56 |
| II | 069-1 | PROT | K20I  | 99.26 |
| II | 069-1 | PROT | F53L  | 2.08  |
| II | 070-1 | RT   | E138A | 99.64 |
| II | 070-1 | RT   | V179T | 2.83  |
| II | 070-1 | RT   | F227L | 1.32  |
| II | 074-1 | RT   | F227L | 1.02  |
| II | 074-1 | PROT | K20T  | 9.92  |
| II | 075-1 | RT   | E44D  | 89.33 |
| II | 075-1 | RT   | Y188C | 1.03  |
| II | 075-1 | RT   | K219E | 5.1   |
| II | 075-1 | PROT | L33F  | 98.67 |
| II | 075-1 | PROT | E35G  | 2.15  |
| II | 075-1 | PROT | N83D  | 1     |
| II | 075-1 | INT  | H51Y  | 1.06  |
| II | 075-1 | INT  | N155S | 2.41  |
| II | 079-1 | RT   | M41L  | 5.81  |
| II | 079-1 | RT   | D67N  | 3.46  |
| II | 079-1 | RT   | V179D | 99.51 |
| II | 079-1 | RT   | Y181C | 11.33 |
| II | 079-1 | RT   | M184V | 11.11 |
| II | 079-1 | RT   | H221Y | 9.92  |
| II | 079-1 | RT   | F227L | 1.36  |
| II | 079-1 | INT  | G163R | 2.38  |
| II | 081-1 | RT   | F227L | 6.49  |
| II | 081-1 | INT  | L74I  | 99.68 |
| II | 081-1 | INT  | Q148R | 1.11  |
| II | 082-1 | RT   | D67N  | 1.16  |
| II | 026-2 | RT   | D67N  | 1.31  |
| II | 026-2 | PROT | F53L  | 4.21  |
| II | 026-2 | INT  | E138K | 1.4   |
| II | 026-2 | INT  | G163R | 40.28 |

|    |        |      |       |       |
|----|--------|------|-------|-------|
| II | 026-2  | INT  | R263K | 16.27 |
| II | 029-2  | RT   | D67N  | 1.05  |
| II | 029-2  | RT   | K70N  | 14.12 |
| II | 029-2  | RT   | K101E | 7.49  |
| II | 029-2  | RT   | V118I | 27.03 |
| II | 029-2  | RT   | M184V | 4.97  |
| II | 029-2  | RT   | K219E | 2.61  |
| II | 029-2  | RT   | M230L | 4.54  |
| II | 029-2  | INT  | L74I  | 99.26 |
| II | 031-02 | RT   | K65E  | 1.26  |
| II | 031-02 | RT   | M230I | 2.05  |
| II | 031-02 | PROT | G73S  | 2.82  |
| II | 032-2  | RT   | M41L  | 2.6   |
| II | 032-2  | RT   | D67N  | 2.46  |
| II | 032-2  | RT   | K70R  | 2.49  |
| II | 032-2  | RT   | V75I  | 2.57  |
| II | 032-2  | RT   | Y181C | 2.46  |
| II | 032-2  | RT   | M184V | 2.38  |
| II | 032-2  | RT   | T215F | 2.24  |
| II | 032-2  | RT   | K219E | 2.63  |
| II | 032-2  | RT   | N348I | 92.9  |
| II | 032-2  | PROT | F53L  | 4.81  |

| <b>Group</b> | <b>Sample ID</b> | <b>Protein</b> | <b>Mutation</b> | <b>Prevalence</b> |
|--------------|------------------|----------------|-----------------|-------------------|
| III          | 052-1            | PROT           | L10F            | 2.12              |
| III          | 054-1            | PROT           | M46I            | 99.19             |
| III          | 054-1            | PROT           | L76V            | 99.48             |
| III          | 054-1            | INT            | L74I            | 99.5              |
| III          | 061-1            | PROT           | F53L            | 1.04              |
| III          | 064-1            | RT             | E44D            | 95.48             |
| III          | 064-1            | PROT           | L33F            | 1.31              |
| III          | 064-1            | PROT           | F53L            | 1.12              |
| III          | 065-1            | PROT           | I50V            | 1.06              |
| III          | 066-1            | RT             | V118I           | 98.01             |
| III          | 066-1            | PROT           | V11I            | 100               |
| III          | 066-1            | PROT           | K20I            | 99.18             |
| III          | 085-1            | PROT           | L10F            | 99.83             |
| III          | 085-1            | INT            | G163R           | 96.44             |
| III          | 027-2            | RT             | D67N            | 1.14              |
| III          | 027-2            | PROT           | F53L            | 5.04              |
| III          | 030-2            | RT             | K65E            | 4.93              |
| III          | 030-2            | RT             | K103R           | 42.06             |
| III          | 030-2            | PROT           | F53L            | 4.34              |

| <b>Group</b> | <b>Sample ID</b> | <b>Protein</b> | <b>Mutation</b> | <b>Prevalence</b> |
|--------------|------------------|----------------|-----------------|-------------------|
| IV           | 056-1            | RT             | E138A           | 99.64             |
| IV           | 063-1            | PROT           | F53L            | 1.15              |
| IV           | 084-1            | PROT           | I47V            | 2.46              |
| IV           | 087-1            | RT             | E44D            | 100               |
| IV           | 087-1            | INT            | S230R           | 1.02              |
